# Supplementary material for: A general low-temperature synthesis route to polyanionic vanadium phosphate fluoride cathode materials: AVPO4F (A = Li, Na, K) and Na3V2(PO4)2F3
Source: Royal Society of Chemistry journal article supplement (doi:10.1039/c9qm00325h), 2019-01-01
Supplement: c9qm00325h1.pdf [file c9qm00325h1.pdf]

## Supplementary Information

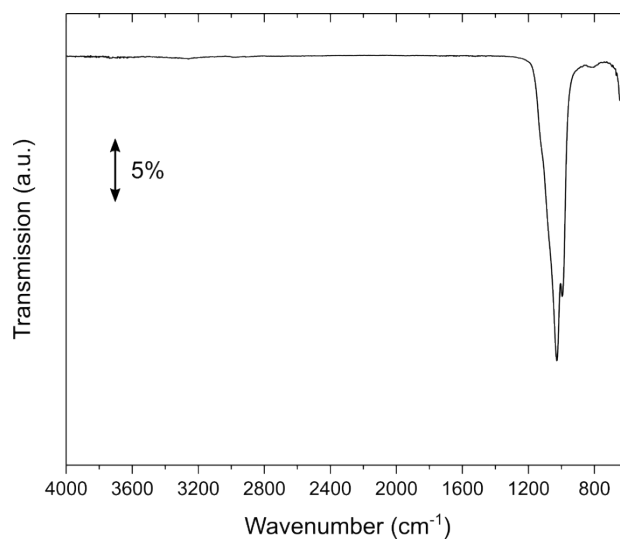

Figure S1: FTIR spectrum of the synthesized  $\text{LiVPO}_4\text{F}$  material, showing the  $(\text{PO}_4)^{3-}$  stretching bands in the  $1100\text{-}900\text{ cm}^{-1}$  region. No  $\text{OH}^-$  nor  $\text{V}^{4+}=\text{O}$  moieties could be detected.

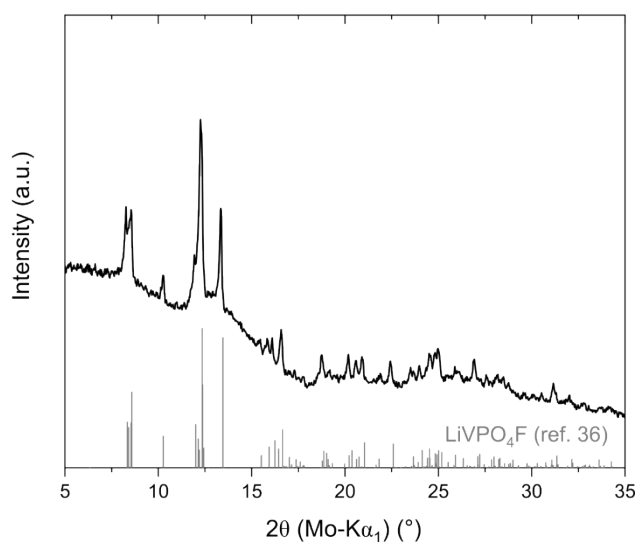

Figure S2: X-ray diffractogram of the obtained  $\text{LiVPO}_4\text{F}$  powder after a short microwave-assisted solvothermal treatment of the precursor solution at  $240^\circ\text{C}$  for 40 min.

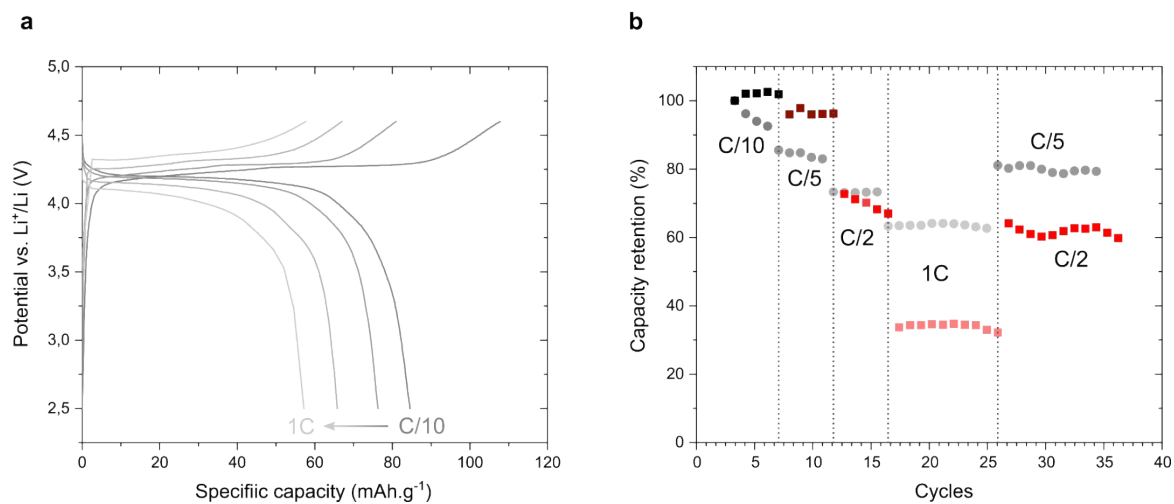

Figure S3: (a) Typical galvanostatic profiles at various C-rates of the pristine sample in the high voltage region. (b) Capacity retention of both pristine (in grey) and ball-milled  $\text{LiVPO}_4\text{F}$  (red) at various C-rates in the high voltage region.

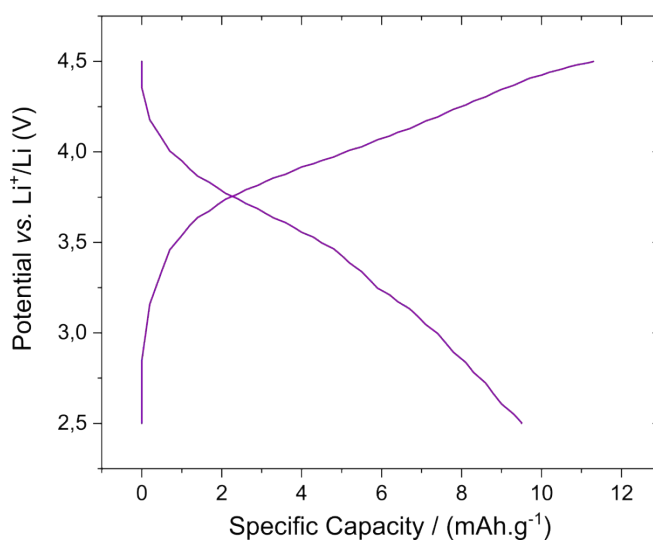

Figure S4: Galvanostatic profile of the tavorite-like obtained  $\text{NaVPO}_4\text{F}$  material, at C/10 rate

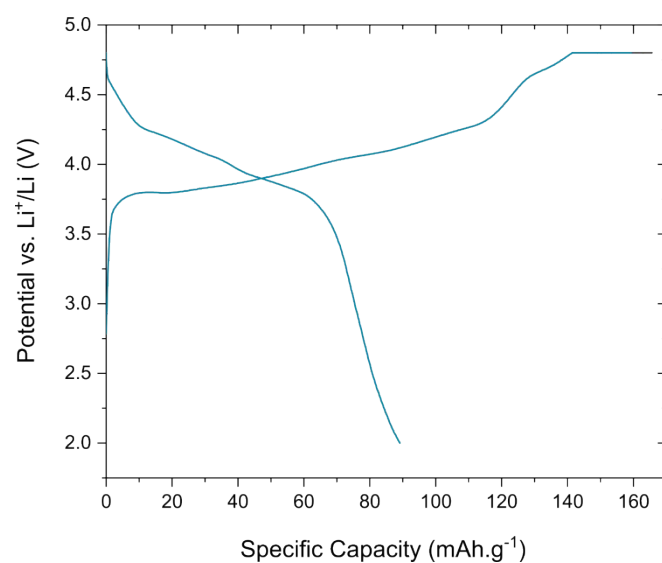

Figure S5: First charge/discharge cycle of the  $\text{KVPO}_4\text{F}$  material in a Li-ion half-cell. The deintercalation of  $\text{K}^+$  occurs from 3.8 V vs.  $\text{Li}^+/\text{Li}$ .  $\text{Li}^+$  ions are then intercalated in the structure during the discharging step.
